# Supplementary material
Source: publisher figshare collection journal article supplement (https://tandf.figshare.com/articles/dataset/_/4987067)
Supplement: Supplementary file 1 [file 2]

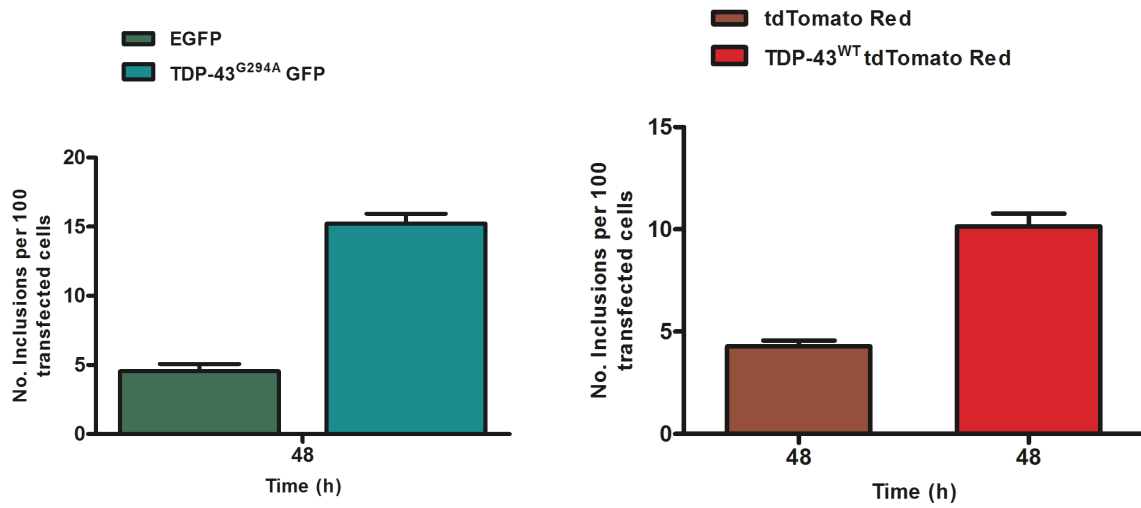

**Fig. S8. Inclusions counted per transfected cell from imaging.** Cells were transfected and then imaged through time using an Incucyte zoom. Inclusions were identified by eye and scored as a percentage of total cells transfected.
