# Supplementary material
Source: publisher figshare collection journal article supplement (https://tandf.figshare.com/articles/dataset/_/4987067)
Supplement: Supplementary file 2 [file 2]

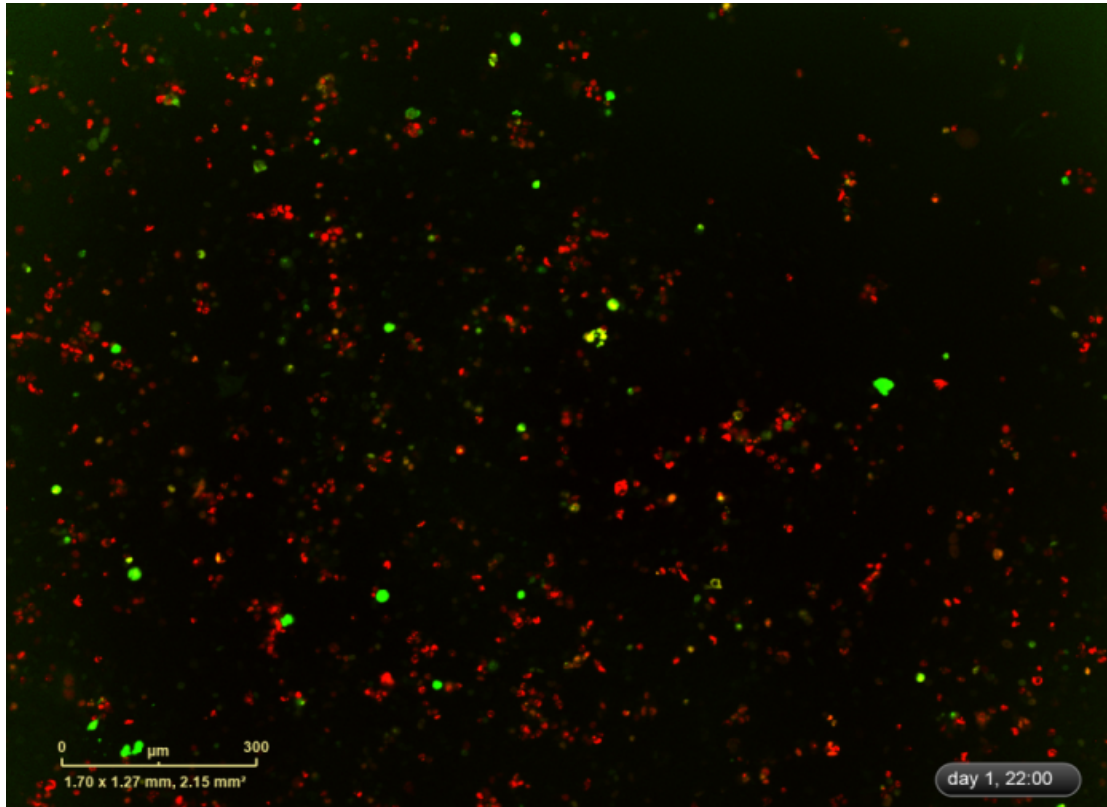

**Fig. S12.** Widefield view of cells co-transfected with both G294A TDP-43-tGFPwt TDP-43-tdTomato and cultured for 48 hours after transfection. Cells were transfected and then imaged through time using an Incucyte zoom. (Scale bar 300  $\mu\text{m}$ ).
