# Supplementary material
Source: publisher figshare collection journal article supplement (https://tandf.figshare.com/articles/dataset/_/4987067)
Supplement: Supplementary file 3 [file 2]

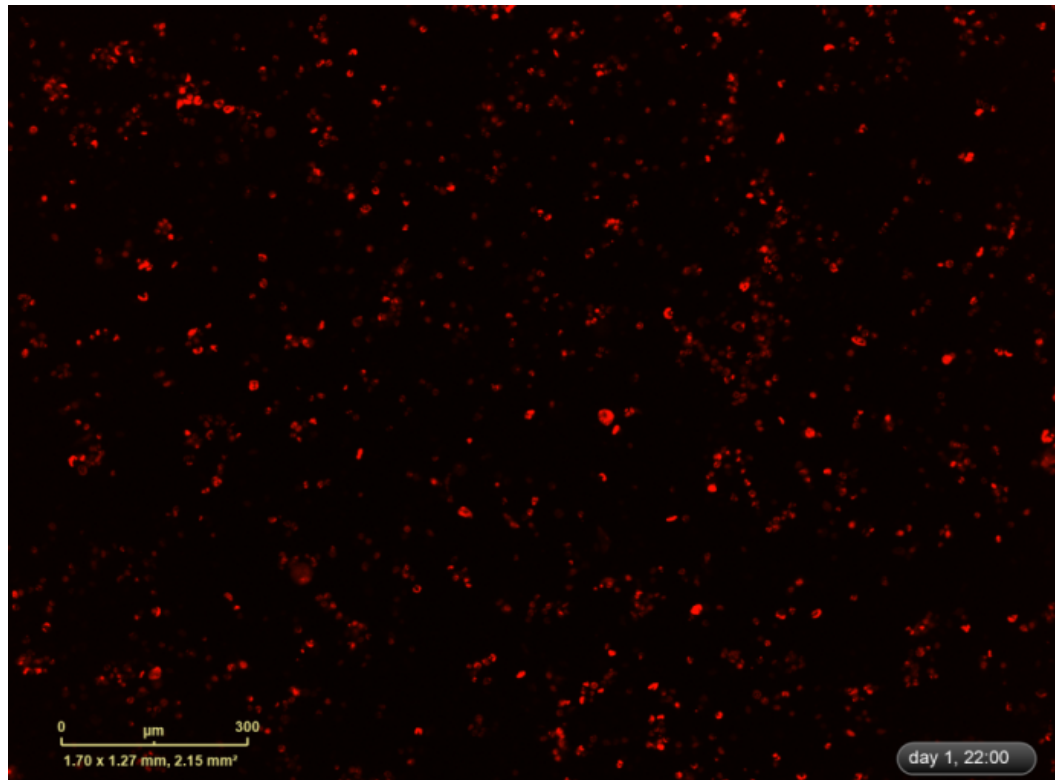

**Fig. S7. Widefield view of cells expressing wt TDP-43-tdTomato 48 hours after transfection.** Cells were transfected and then imaged through time using an Incucyte zoom. (Scale bar 300  $\mu\text{m}$ ).
