# Supplementary material
Source: publisher figshare collection journal article supplement (https://tandf.figshare.com/articles/dataset/_/4987067)
Supplement: Supplementary file 6 [file 2]

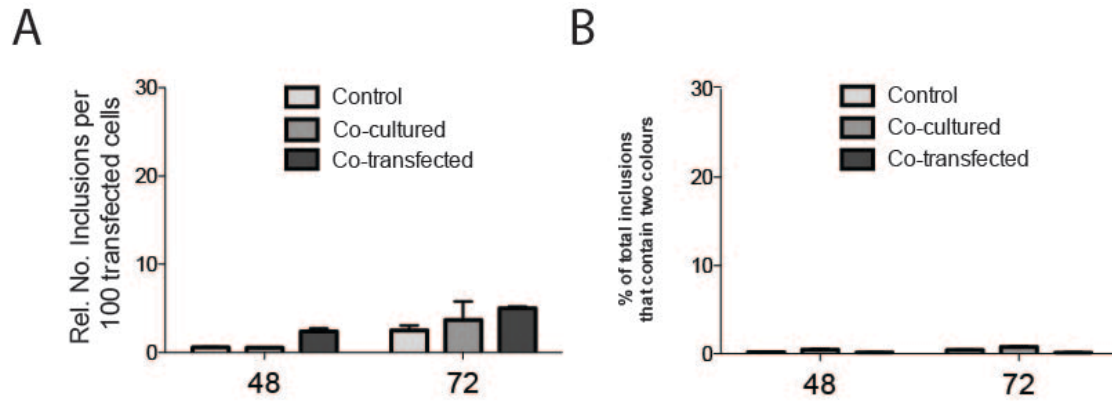

**Fig. S9. FloIT detection of two-colour inclusions NSC-34 cell lysates.** NSC - 34 transiently transfected with tdTomato or tGFP were either mixed at the end of the incubation or immediately following transfection. Alternatively, cells were co-transfected to express both fusion proteins. After incubation for either 48 or 72 h cells were lysed and analysed by FloIT. (A) The total number of tdTomato inclusions including dual colour inclusions were enumerated by FloIT and are shown as means  $\pm$  SEM ( $n = 3$ ). (B) The percentage of TDP-43 inclusions formed in each treatment at time intervals that contained both tdTomato and tGFP enumerated by FloIT are shown as means  $\pm$  SEM ( $n = 3$  independent experiments). To allow comparison to the TDP-43 fusions, these results are presented on the same y-axis scale, and the inclusions counted here are relative to the level of mean fluorescence of TDP-43 fusions, as presented in Fig 3.
