# Supplementary material
Source: publisher figshare collection journal article supplement (https://tandf.figshare.com/articles/dataset/_/4987067)
Supplement: Supplementary file 8 [file 2]

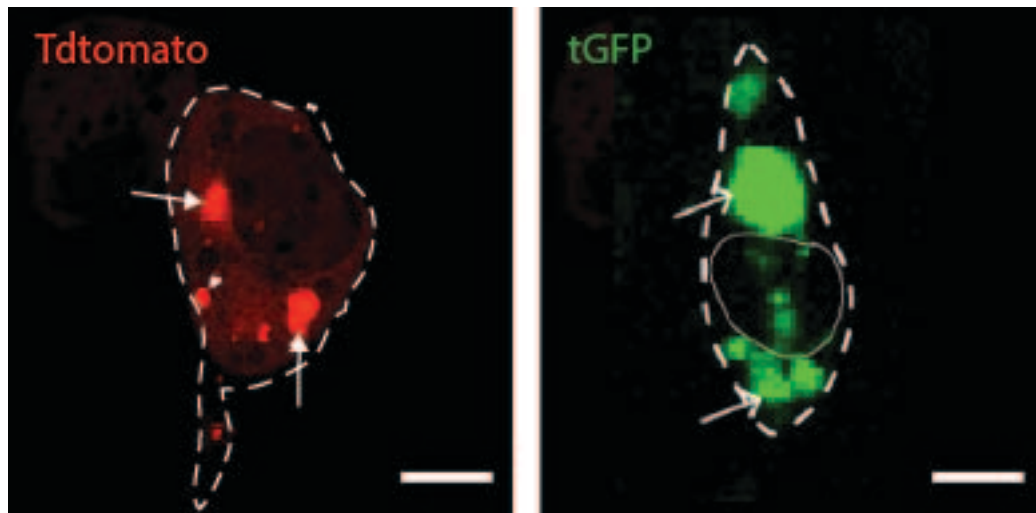

**Fig. S2. Morphology of tdTomato and tGFP aggregates.** Confocal microscopy identifies distinct inclusions (white arrows; Scale bar 5  $\mu\text{m}$ ). Dashed line represents cell border from transmission image.
