# Supplementary material
Source: publisher figshare collection journal article supplement (https://tandf.figshare.com/articles/dataset/_/4987067)
Supplement: Supplementary file 11 [file 2]

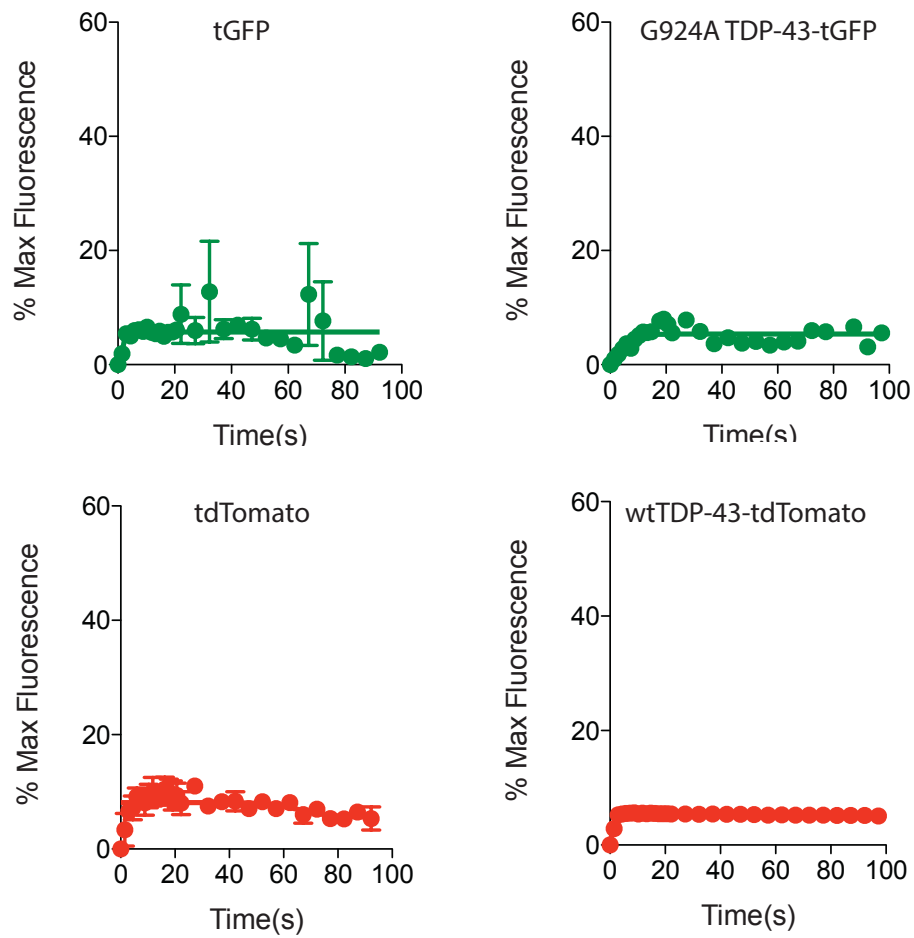

**Fig. S1. FRAP analysis of inclusions containing TDP-43, tGFP or tdTomato.** FRAP analysis of proteins in inclusions in NSC-34 cells expressing either tGFP, mutant G294A TDP-43-tGFP, tdTomato or wt TDP-43-tomato. Mean fluorescence intensity (from within the ROI) plotted over time. Prebleach intensity was recorded, and recovery was recorded for up to 100s. Low recovery is consistent with dense insoluble aggregates. Results are means and standard deviation from  $n = 3$ .
